# Supplementary material
Source: PubMed Central journal article supplement (PMC3888901)
Supplement: NIHMS514636-supplement-2.pdf [file NIHMS514636-supplement-2.pdf]

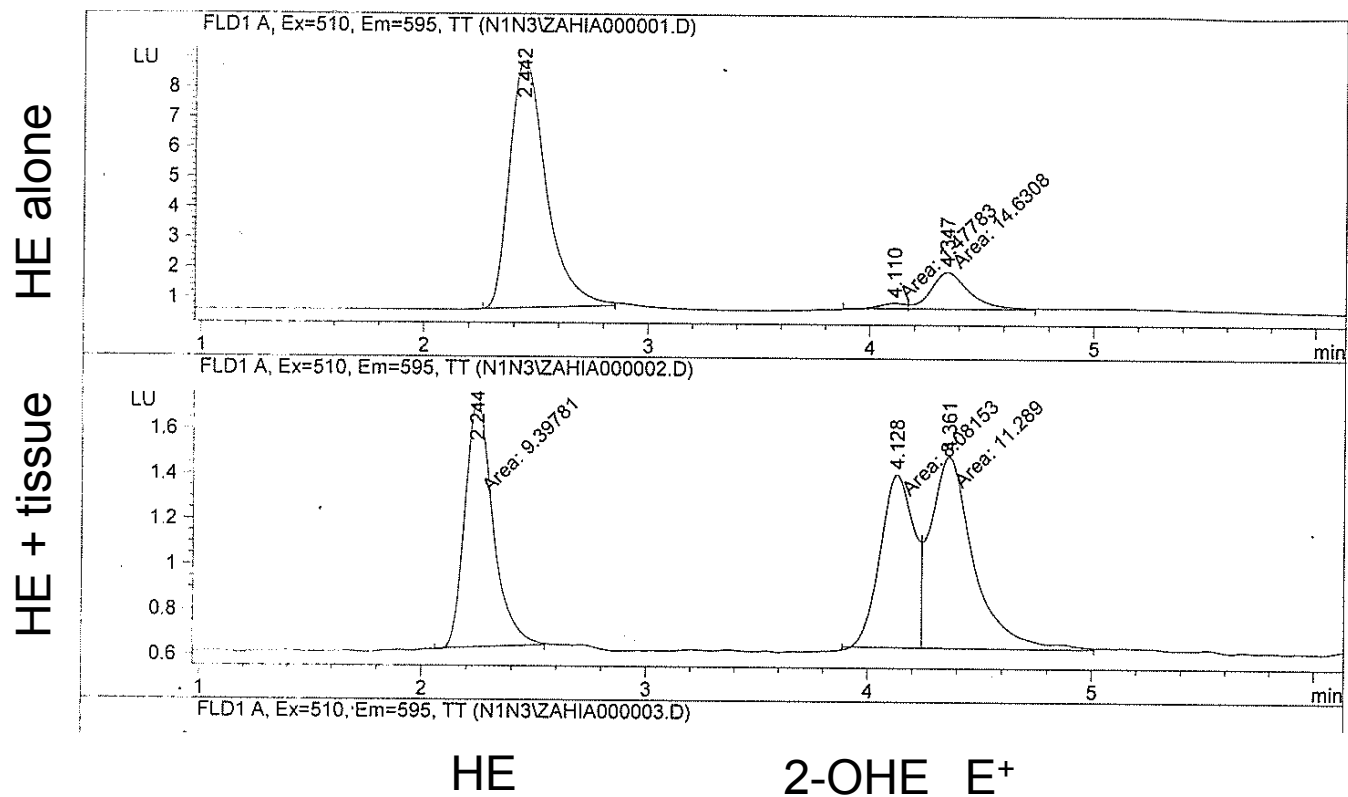

**Supplemental Figure I.** Representative HPLC readouts illustrating measurement of HE oxidation after exposure to aortic tissue (bottom) versus HE alone (top). HE = hydroethidine, 2-OHE = 2-hydroxyethidium, E<sup>+</sup> = ethidium.
